# Supplementary material for: A MYB-related transcription factor from sheepgrass, LcMYB2, promotes seed germination and root growth under drought stress
Source: PubMed Central journal article supplement (PMC6921572; doi:10.1186/s12870-019-2159-2), 2019-12-18
Supplement: 12870_2019_2159_MOESM1_ESM.pdf [file 12870_2019_2159_MOESM1_ESM.pdf]

## Additional files

Table S1. MYB and MYB\_related transcription factors identification

| Gene        | RPKM_Control | RPKM_Drought | RPKM_Rewater | type        | Score | E-value |
|-------------|--------------|--------------|--------------|-------------|-------|---------|
| contig41717 | 22.8688947   | 57.58332     | 48.41176     | MYB         | 175   | 3E-57   |
| contig15322 | 17.73679374  | 37.78933     | 30.97388     | MYB         | 258   | 5E-28   |
| contig38518 | 10.10650718  | 24.2016      | 22.77177     | MYB         | 175   | 1E-40   |
| contig01062 | 1.880465132  | 37.23147     | 4.064789     | MYB         | 354   | 1E-37   |
| contig15178 | 0.2889886    | 42.63504     | 12.49348     | MYB         | 368   | 2E-93   |
| contig44358 | 39.57482806  | 5.361926     | 10.36331     | MYB_related | 409   | 8E-31   |
| contig44351 | 35.69527631  | 12.70035     | 344.4308     | MYB_related | 186   | 2E-12   |
| contig24103 | 32.6106677   | 10.52065     | 12.07709     | MYB_related | 338   | 9E-35   |
| contig00136 | 23.66852542  | 6.21474      | 18.46036     | MYB_related | 612   | 2E-11   |
| contig57273 | 11.77386295  | 41.7281      | 26.24555     | MYB_related | 616   | 3E-21   |
| contig01121 | 10.66736584  | 22.21401     | 8.573009     | MYB_related | 491   | 1E-54   |
| contig37682 | 9.165365313  | 63.0881      | 15.4415      | MYB_related | 343   | 3E-159  |
| contig00451 | 7.822307266  | 31.72925     | 9.027471     | MYB_related | 343   | 2E-156  |
| contig41859 | 5.089292411  | 57.75639     | 20.94411     | MYB_related | 387   | 9E-41   |
| contig24769 | 1.146439849  | 25.81515     | 11.68261     | MYB_related | 491   | 2E-39   |
| contig62249 | 12.28328409  | 43.91724     | 21.59513     | ERF         | 370   | 1E-79   |

Note: partial data in the Table\_S9 from the paper "New Insights on Drought Stress Response by Global Investigation of Gene Expression Changes in Sheepgrass (*Leymus chinensis*).2016.Frontiers in plant science"
