# Supplementary material for: A MYB-related transcription factor from sheepgrass, LcMYB2, promotes seed germination and root growth under drought stress
Source: PubMed Central journal article supplement (PMC6921572; doi:10.1186/s12870-019-2159-2), 2019-12-18
Supplement: 12870_2019_2159_MOESM2_ESM.pdf [file 12870_2019_2159_MOESM2_ESM.pdf]

1 **1: Amplification of full length LcMYB2**

2  
3 **A: 5'-RACE for *LcMYB2***

4 The first-strand cDNA was synthesized with SMARTer™ RACE cDNA Amplification Kit (Clontech). A  
5 gene specific primer and a universal primer was used for 5'-end amplification.

6 Primers:

7 5'GSP: 5'- GACAGGCATATAGGGTATTTTC -3'

8 UPM: 5'- CTAATACGACTCACTATAGGGCAAGCAGTGGTATCAACGCAGAGT -3'

9 5'- CTAATACGACTCACTATAGGGC -3'

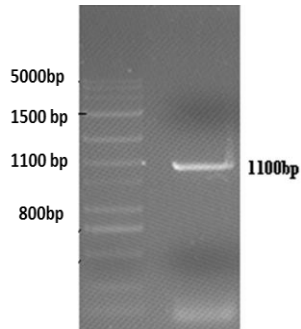

12 **B: Full length amplification of *LcMYB2***

13 A putative full-length sequence of *LcMYB2* was amplified using the specific pair of primers:

14 LcMYB2-F: 5'-ATGACGAGGCGGTGCTCGCAC-3'

15 LcMYB2-R: 5'-GACAGGCATATAGGGTATTTTC-3'

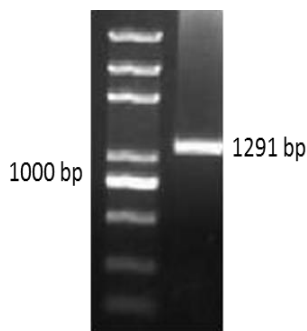

19 **C: OFR region amplification**

20 Primers:

21 LcMYB2-ORF-F: 5'-ATGACGAGGCGGTGCTCGCAC-3'

22 LcMYB2-ORF-R: 5'-TCAAACGTCATGGATTGGGCTG-3'

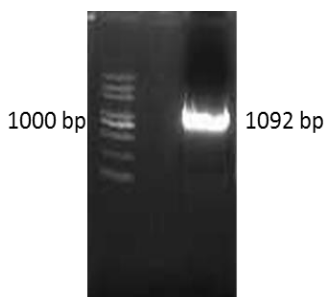

26 **2: Amplification of LcDREB2 promoter sequence**

27 Previous studies revealed that *Leymus chinensis* has closer relationship to *Hordeum vulgare* and *Triticum*  
 28 *aestivum* [1], therefore, we search the whole-genome shotgun contigs (WGS) of *Hordeum vulgare* and  
 29 *Triticum aestivum* with *LcDREB2* (JF754585) and find that partial sequence locating at 5'-end of *LcDREB2*  
 30 is aligned to gi\_413832468 (*Hordeum vulgare*) and gi\_439956959 (*Triticum aestivum*) (Fig. 1). Two primers  
 31 (P1, P4) were designed according to the conserved sequence of *Hordeum vulgare* and *Triticum aestivum* and  
 32 were used to amplify the putative promoter of *LcDREB2* using total genomic DNA of sheepgrass as template.  
 33 A fragment about 500bp was amplified and cloned into pMD18-T vector for sequencing (Fig. 2). Three  
 34 independent clones were sequenced and used to assemble with *LcDREB2* (Fig. 5). According to the  
 35 assembling sequence (AS1), two primers (P190, P268) were designed to amplify the upstream unknown  
 36 sequence based the Self-Formed Adaptor PCR [2]. A fragment of about 1000bp was obtained (Fig. 3),  
 37 ligated into pMD18-T vector, sequenced and assembled with AS1 to get the new sequence (AS2) (Fig. 5).  
 38 Based on the same method, we acquired another fragment using primers P561 and P784 (Fig. 4). At last, all  
 39 the sequence were assembled together to form a putative complete *LcDREB2* sequence (Fig. 5). At this time,  
 40 a primer (F7) picked out in the putative promoter region and another primer (R1821) picked from the coding  
 41 sequence of *LcDREB2* were used to confirm our previous assembly result. We successfully amplified a  
 42 1500bp fragment and sequence analysis revealed that about 200bp of this fragment is the same as the 5'-end  
 43 of *LcDREB2* (JF754585) (Fig. 6, 7).

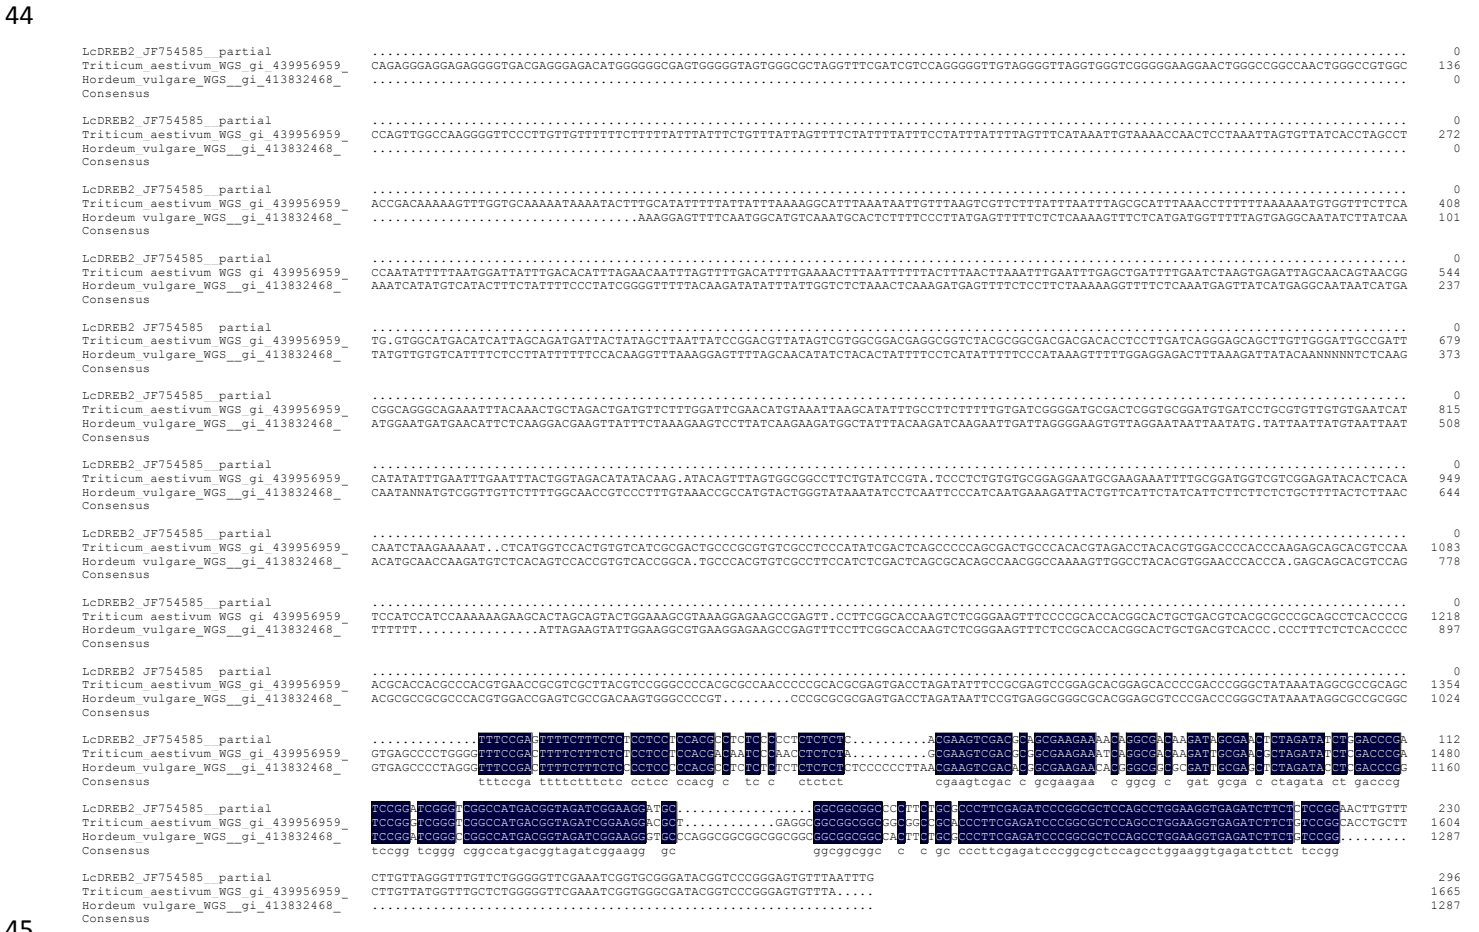

46 Fig. 1 Sequence alignment of *Leymus chinensis* (*LcDREB2*), *Hordeum vulgare* (gi\_413832468) and *Triticum*  
 47 *aestivum* (gi\_439956959)

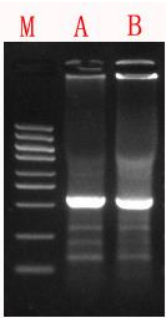

48  
49  
50  
51

Fig. 2 The single main band on 1% agarose gel showing the products amplified with P1 and P4  
M: BMD5000+1.5k ladder, the bands indicate 5, 3, 2, 1.5, 1, 0.75, 0.5, 0.25, 0.1 (kbp) from up to down

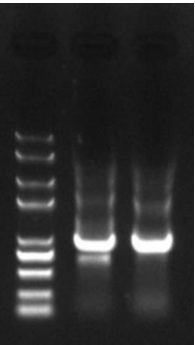

52  
53  
54

Fig. 3 The single main band on 1% agarose gel showing the products amplified with P190 and P268

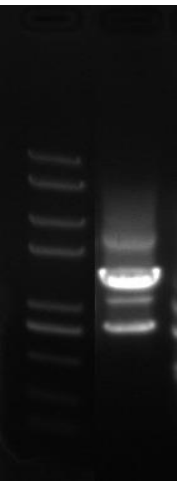

55  
56  
57

Fig. 4 The single main band on 1% agarose gel showing the products amplified with P561 and P784

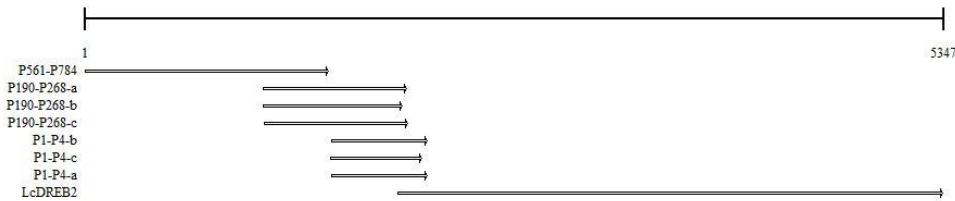

58  
59  
60  
61  
62

Fig. 5 The assembly result of putative promoter sequence and transcriptional region of *LcDREB2*



90 GAGCGTCTGCTCTGCGCTGGAGCATCAGGGGCTTGGGGCACGCTGCTGGGGTGGAAACCCGGA  
91 GGAGAGGAGGCGGCGGGGCTAGTTGCGGTGGCGCCGACATCGCAGCTACGTGCTAACGTGGGG  
92 TGGCAGTGGCGGCGTAACCCTAGCGCTCGGGCTGGAGAAAGAACGAGAGGAAGAAGTCATGC  
93 GTGACCAGAGATGGCAGCCCCTTGTTCCTCGGCGGTGGCATGCTTTGAAATTTTAGCGAAGTAC  
94 CAAACCGTGCATTTTTTCACTTGGCGGTGGTAGGGGGTGTAAATTTGTGTGGACTCCATGAAAATG  
95 GAGAATTCGTGGCGCTGGGAATACCCAGCTTCTCCAACCTCCGCCAAAAAATGCACTGAGGCCCA  
96 ATACAGCTTCTCGAATTTAGCTTCGCAGAGCTCAGGCGTTCGGCCCCAGCTTCACACGCGGAGT  
97 TCGCGAAGTGCAGAGCTGGAGAAGGTTTCAGAACAAGACCCTTGGGGGACGGATTTGTCACGAA  
98 TGTAGATGCTCTAAGGAAAAGGAAAAGGTGTTGGAGTTGCTCTCGGGACCGGAGAGTGGACTC  
99 CACGCTTGCCACCACTGATCCATGCAACAAAGATGTCTCACAATCCATCTTGTCATCCGACTGCA  
100 CACGTGTCGCCTCCCATATCGACCCAGCCCCAGCAATTGGCCATACGTGGGCCTACACGTGGA  
101 ACCCACCCAGAGGAGCACGTCCAATCATACAAAAAAAGGAAGTATACAAAATACTGGAAAGC  
102 GTAAAGGAGAGGCCGAGTTTCTTCGGCACCAAGTCTCCGGAAGTTTCCCCGCACCACGGCACT  
103 ACTTACGTCACGCGCCCGCAGTCTCACCTCCCACGCACCGCGCCACGTGGACCGTGTCACTTA  
104 CGACTGGGCCCCACGCGCCAACGTCCGGACGCGAGTGACCTAGATAATTCCGCGGGGCAGGAG  
105 CACGAAGTATCCCGACCCGGGCTATAAATAGGCGACGCGCCGCGTGCCCCCTGGGGTTTCCGAGT  
106 TTTCTTTCTCTCCTCCTCCACGCCTCTCCCCCTCTCTCTCACGAAGTCGACGCAGCGAAGAAAAC  
107 AGGCGACAAGATAGCGAACTCTAGATATCTGGACCCGATCCGGATCGGGTCGGCCATGACGGTA  
108 GATCGGAAGGATGCGGCGGCGGCCCTTCTGCGCCCTTCGAGATCCCGGCGCTC

109

- 110 1. Chen SY, Huang X, Yan XQ, Liang Y, Wang YZ, Li XF, Peng XJ, Ma XY, Zhang LX, Cai YY *et al*: **Transcriptome Analysis in**  
111 **Sheepgrass (*Leymus chinensis*): A Dominant Perennial Grass of the Eurasian Steppe.** *Plos One* 2013, **8**(7).
- 112 2. Wang SM, He J, Cui ZL, Li SP: **Self-formed adaptor PCR: a simple and efficient method for chromosome walking.**  
113 *Applied and Environmental Microbiology* 2007, **73**(15):5048-5051.

114

115
