# Supplementary material for: A MYB-related transcription factor from sheepgrass, LcMYB2, promotes seed germination and root growth under drought stress
Source: PubMed Central journal article supplement (PMC6921572; doi:10.1186/s12870-019-2159-2), 2019-12-18
Supplement: 12870_2019_2159_MOESM3_ESM.pdf [file 12870_2019_2159_MOESM3_ESM.pdf]

## 1. Promoter sequence

>AtLEA14-Promoter

TTTTGTTTGTATAACCACAACAATTGTTAGTAGATCATATATGAATTGTAATGAAAAATTATATTAGTGACTAGT  
GAGAGTTAGTTATTTATATCTTGATTTTTTTTTGTAGTTGGTGGGTTTGGACTCTTTGGTCAAGTCAATCACAT  
GCTCTACGTGATTTTACTTGCAGTTCACGCCGAAACTCTCACGCGTCGACCACGTGACTAGACCTAGTTCAT  
AATTTTTATCGTCTGAATGTCAAAAACCTCAAATCCTCCTTTTTATAACCGTTTTCTTTGAAAACAAGGTATTTT  
CTTAATCTTGTTCATGTCTTAAGACTAAAGATATTAATAATCTGATTTTGGCTCTACTTATACTAATGTCGTATTA  
CAATAACTAAAGTCTCAACAATATTCTTTAAGCACGCATTGCTGGAAAAATTAATTACAGGGGGGACATAAG  
ATCTCAATAATATAGACTGAAGATATCAACTTTTGGCTATTTGGAGTCGTTACATCTACACTTTCAAACAAAAC  
CAACGAACCCATTGTTTTTTGGGATCCTACGAATCCCTTGTGTAAACAATAATTAAGACAGTCCTAAACTAA  
TATTCTCTTATCAAGTTTGGAAACATTGTAGCTTTGTGAATATATTATTTTGTCTAAGAAGAAGCTTTTTGTTTGT  
AAATAGTTTTTTTTTTGGATGTGTTTCTCATGAAATGCAGGTAAGAAACATCTAATGAATTAGAAATAGATTA  
TGAATAAAAGAAAATAATTTGTAAGAAACACCGAACAAGGAGTTCGTATTTCGTATACTAATTGGCCCGCC  
AACTACCAACACCGACATATGTGCTTTTCGGCAGTTTTGATATCATCCAAAATTTCAATTATTATTTATCAAAT  
TATTTTCTTGGTAAAAGTTTAATTAATTTCAATTATTTGAATGTCTTAATTCACTGATTACAAATTATATATGTAA  
TATATACATAACAATTTTCGTTTCGTGGAGTGTATTATACTCCTTAAGCGAATCTGTATATTTAAATAAAATTTTG  
ATTTATGCACACGTACATGTTCAATTGAAACGTTTTCCCTAACTATAGATGCCAATAAATAATAAGTTGATTTTT  
AAAATGTACAAAACAAAAGGTACCGTTTTGTAAAATTTTGCAACCAAAAAGTACAATCGGCCGTTGAAAATC  
GTGGAACCAAACTAATTAAGAGAAGTGTGAATATAATCTAGTGTTCGCGATTATATTATAAAATTTGTG  
TATCACTAAAATGTCAAAGCATGCTTTGACTGGTCAATAAGTCAAATTAATACTAACAACCATGCGAGGCGTA  
GGTTTGACTTCTTAACATAAATGCTGACTCAGTTTTTCCATTCCGCAGCTGTGCGACTAATTGGACACGCTTCT  
TCCAATCCCTTTCCACTAATCATCCATCAACACGTGACATGCCTACAGTGCACGACTTCACAGTGATCATGTC  
AAAGTTTTGTTTTTAAGAGAAGAAGATTCACGACTTCACAGTGATCATAGTCCAGTTACAAATTTGAATGGG  
CTTATGGCCTGTGGCCATTTAAGTTTGACCTTAATATCCATCAGAAACCCATACCAATACGGGTCATAAGTGC  
ATTGTCCATATAGTGTACCGCAATGCATGGGAGTACTACTACATTCCACCGACGTGCATATGGGGGGACATGG  
TCGGTCCATTAATCCCTTGCGCATCTTATTCCTTACGCGAATACTTTTCCCTCTTTTAGTTTTGTATAATACTTTC  
CATTTTTTTGGTATTAATTTATCGTGTGACTATCTAAAAGGTATTTAATTATCTAGTTTAGCTATAACTGCAA  
ACAAAATATCTATTTTCATGAATGATATATTTTTGAAATAAAATATTGTTGTGCATGTAACGAAAAAATCAAAAAT  
CAAGCAGAAGACACGTATAACCCACGCTTTCACTCTCACTCGTGGAAAACCCCTCACACGTACACAAACCATT  
ATAAAATTTAATCCATTTACATCGACCG

>AtP5CS1-Promoter

ATTATCGTTTTATGTACCCTTTTTTTTACGTACCAATCAAAATCGCATCTTTCTTTTCAAATATAATTATGTATATA  
TACGCATGTGCAGCTGCTGCGTGTCTATGCATACTTGAGTCTAAATAACTATCCCTGACTATGATATGTCGTTG  
GTTACGAATGTGATCTTTAGTTAAAATAACAAGAATAATATCACACAGACAAAAACAATAAGTGCATATTAT  
TTCAACAAGATTGGAGTGGGTGGGCCTAAAGGCTTAAAAAATAGAGCACATGCACAGAGGACCATTGATT  
CCCCAGAGACAATCAGACATCTGAGACCCTAATCGCATCAAGCCGCGTGCCCTTCTTCCATTAATAATTTTG  
TGTGTTTGTTTTGGCTTAAACCTGAGAATTACATTGATTACTTTATTTGTTTCATTTTCTCCATGAAGGAGATAA  
AAAGAGTAAAATAGAGATTGATGAAAACCTGAAAAGAACTGAAGTCGGTAAGATAGGTGTTGGAACCT  
GGAATAATGGCTTGGCTTTGAACAAAACGCATGCACCATTCAATGCCTTCAAGTTTTTTGCAATTAGCTTTGT  
TTTTGTTTTTGTTTTTTGTTTTTGGGAGAGGTTCTAATGACCAAGAATCAAGAGCGTTGTCTAAAATCTAAACC  
ATATGATACGGTTTTTAATATTCTCATGCATTAATAATGTACTATTTCTATATATGATCTTATATACCCAACATCTTG  
GAATTAATAGTTTGATTTCGTTATCATTTGAAGAAGCTCTCAACAGCTTCAAAAAGCGAAATGTAGCATCATGA  
AGCGGTATCCAATTTCAAGAAGCTACCAGTAGCTTGTGGAAGTTTTCAAGAAGTTTTCCGGAAGATCCAACG

ATTGTGGAAGCCCCTCATAGTTTTTTGGAAGTTTTCAATGATATTAGCAGCGTTGAGCGTGGCATGGCTAGACA  
ATGTAAGAGATTTGATTTGCAACACATTTGATGTATTTTTTACTTTTGAGTTACAATTGTAATGTATTATTGATT  
TTGCCAGTTATGATTTATAAACCCTACAATTTAGTATCAAAGTTTTTATTTAAAATTCTGAATCTGACATTAAT  
GATATCTGGCTCATTTACAGAGCCAATGAGATGGATGATGTTTCGAAACTGGATTGGCCATTATTTATCTTTTTT  
TTATCTGGAGAATCTCGAGGTTGGCACAAACATTATCATATTAGCCTTTAGAAATTGGATTGGCTAATCACACA  
TTTATATATATTCTTACCAAATAAATCACCTCTCCCGTAATTGAAAAATATCTAAATACTGTAAGTCTGAAAAA  
ATTCACAAGGGTTCGAAGAAAGAAGGAAATATCTAAGCATCATTAATAAACTATCTGTAACCTGAGGGAAAA  
TCATTTTCATGTTGAAATAATGTGGATTTGGAAGTTTTATAATCTATCTGAATTTGTGAAATTTGATAACAAGTAA  
GATTTGTTTCTTAACACAAATCTAAAATTTGTTTTCTAATTAGGTTTGAGAGAGAGAGAGAAAGAAACGCTTT  
GTATGATACACATCTAGGCTATGAATGAAGGCAGCGGACAAAGCGGTCTAATTTGTCTGCGGTTTAGTCCATC  
TCATTTTTGGGGTGGACAATAAACCCTGCGGACCAAGTTTATTTGTATGTAAAAACGGTCCGCAGATGGTC  
CGCAACGATTTCTTCTATTTTTTTAAGTCCAGACCACTGCGGACTATAATTGATGAATGATAAATAAAAAACG  
GTCTGATCCGTTGACGGTTTTGTCCGCCCAACCAGCCATAACCATTCAAACCCCTAATTATTTTCATCAGATAAC  
ATTATACACTAATAATCATTGCACTCAAATATGTCACACAATCATATAATAAATAAATAACAATGATTAAAATGA  
AAAAATTGTTGTGGCGCCGCATAAAATAGAAATCGTGAGAGACGACGTCATCTAAAAATTGCCTTGCTGTCC  
ACTTTTCACTTTGTCTCTCTTCTCATCTCCGTTCA

>AtDREB2A-Promoter

TTTTCAACAAATCATCTCGTCTTGCCTCCAACGTGTCGTACAGTTTTCTTTAGAGCCGCTACATGATCTACGAG  
GTTGCGGAAGCGATTTTGGTTCCTGCTAAGGCAGCTTGTAAGGTTATTAACAGCCTGGTCACAGGATATTGCC  
ACAGAGAAGCAGGCTCCCATCTCTCATAGATTCTCAAATCCTACCAGAGAGATTAATATACAAATTCCTTTC  
CTAATGTTTTAGTTTATTAACCTGAGGTGTGTGCACGATCATTCCGGTTGACCACCAATCTTGGCATCCAGTCAT  
CTACGACTCGATCAAATATTTATGTTATTTTAAAAATGAACTGTAACCAAGATAACATTTTTTTTTCATAAGGTCA  
ACGACCCTTGGGATGTTAACAGAGCCAAGTTTAGTGAGCACTATGTGCTCGTTTTTTCTTAACACAATTCTAA  
CGTGGTTTTGGCCAAGCCAAGTCAACATTTTACTTACATCTCGTTTTTCCAATAATGGTTTTGTAATCGATAACCT  
AAATCATTGTAATGAATGCGTTCCTCCCTATCGATCCTAGGCCTTAGACAATGCTGAATGATTCATAGCCACGC  
GAATAACCTATTCACTAATATGGAAAGAAAGAAGCCAAACTTACAGAGCTCTTCTCACGGTCGTGGAAGA  
AAAGAGAGTCTACAGTCAGCAACAAAATTAGTGTGCCATCATGGCATCATCTTGCAGCTTTTTCCGCACAA  
ATAATTTATCATCAAATGTTGTTCACTAAACCAAAAACAACAAGCATTACAGCGAAGAAACCAACTCGTA  
GATACAGATTTCCAAATTCATGCCTTATTTAGACCAATAAAAACTGAAATTTCTTTCAGCGAAAAAAAAC  
AAACAACTGAAATTTATATAGATCCAGAAGATAGAACTTGTAGGCTCAATCGACTAGACTAGAAGATGC  
TCACCCGATCGTGCTTGAGATAGCGAGATAGTAGCAACACCGACGGTAGAAATAAAATGGACGACACCCATC  
CAATGGGCTAATTTAGATTAACGGGCTTTAAGGGTTTGATAATGGATGTTAATTAACCTGAGGCACATGGGATT  
GTATCACGTAGGCAATGGGTTTGATAATGGATGTTAAGTAACTAAGGCCCATGAGGTTGAAGTACGTAGGCAA  
TTGCGTGAGCTTACGTTAGCGATGCCGTTAGAGACACGTAGTGGATGAAGTGGCTTTGGTTAGCAAAGGACA  
CATGAGGCACATGCAAAGGCTATAAATGACTGCTGCTTTGCTACAACCTTGCATTCCCAAATTTATAAGGTA  
ATGGACCCTATCACCTCTGCTCGAAGCTAAGCCACCAAGTTGAGCTTCACCATTTGACACGTCTCTAGCTA  
ATACTTAATGCTTAACTTTAACTAATACTTCATGTTAAGACATTTCTGGCTGACACATTTATGAATTCGCTC  
TATGTCGTACGTACACCGGAAACCTTTAATTTTACAATATTAACCGTGATCTTTTTAAAATATCTATATAAACG  
ATAAGTATCTCATCAAAACAAAATTGAATAATGTGCACGTTTGTAAAAACTAGAAAAACAGGCAATAAACAT  
CATCATCCAATTACACATCTAGTAAGTGTGATGCAGTGGCAAACCTGGCAATAAACCAAGAAAAATCGAGAAA  
GAGCAGATGAGACAGTGTGTTGTCAGGGTTAATAAAAAAAAATGAAGATTTTTAAAATTTTCATAATAT  
TTAAATAATGAAGTAGTTTTATGATCTTATCCATAAATCAATTTTAAAAAGGTTTAACTTTACTTTTCCGTATC  
AACAGCGTGTTCGAGAAGATTCGGGAGGACACTCGTTCGAACGGAAAAGTTCGCTAAGCCTTTATGTTTCGA  
ATCAAAAACCTGACACGTAACCTTGCTCTCAAACAGAAAAATAAATAATGTTAGAAAAATCTAGAGAAGGCT

ATAAATACTCCGTAGATACTTTGTCTTCCTT

>LcDREB2-Promoter

TCTCCAGCTGACGCAACCGCGTGCCTGGCGCGTCAACTGATGGTGCAGAAAACCGTCAGATCCCTCGGTAG  
GGTCCCTGGCGTAGCTGGAAGTCTCAGAACGGAGGTCGCACGAGGATTTTACCCAGGTTCCGGCCTCCGG  
AGAGTAATACCTACATCCTGCTCGTGTGTTTATTTCATAGTAGAGGGATACCTCGTGCGAGGGGTTTACAAT  
GGTGTGTATGAGATGACTACCGAGAGTTGTTTCTACCGTAGTAGATGGGAATGAGAGTTCCCTGGCCTCCCC  
TTATACTCGAGGAGGCTAGGGTTTTACTGAGAGAGGAAACCGATCTAGGGTTGCCACCGCACCAACTTG  
GAGGTCAAGTTCGCCGCATGGGGTTTATCCTTATCTTCGGGCTCCCTCTTGTCACTGGGCTTCGCGGGCCCT  
CCAGCAGGCCTTTCGCGGGGCTCCCTCGATGAGCCACCCCGGTGAACATCAAATTTGTACCCCTACTCGT  
CGCGAATCCATTCCATCATAGTGCACAACCTATTGTTTCATTAACAAAGGAGATCGAAAATTCATACGTCATGG  
CCGGACTAGAGCGCTCTGCTCTGCGCTGGAGCATCAGGGGCTTGGGGCACGCTGCTGGGGTGGAAACCCGG  
AGGAGAGGAGGCGGCGGGGCTAGTTGCGGTGGCGCCGACATCGCAGCTACGTGCTAACGTGGGGTGGCA  
GTGGCGGCGTAACCCTAGCGCTCGGGCTGGAGAAAGAACGAGAGGAAGAAGTCATGCGTGACCAGAGAT  
GGCAGCCCCCTGTTTCTCGGCGGTGGCATGCTTTGAAATTTTAGCGAAGTACCAAACCGTGCATTTTTTTCAC  
TTGGCGGTGGTAGGGGTGTAATTTGTGTGGACTCCATGAAAATGGAGAATTCGTGGCGCTGGGAATACCC  
AGTTTCTCCAACCTCCGCCAAAAATGCACTGAGGCCAATACAGCTTCTCGAATTTAGCTTCGCAGAGCTCA  
GGCGTTCGGCCCCAGCTTCACACGCGGAGTTCGCGAAGTGCAGAGCTGGAGAAGGTTTCAGAACAAGACC  
CTTGGGGGACGGATTTGTCACGAATGTAGATGCTCTAAGGAAAAGGAAAAGGTGTTGGAGTTGCTCTCGG  
GACCGGAGAGTGGACTCCACGCTTGCCACCACTGATCCATGCAACAAAGATGTCTCACAATCCATCTTGTC  
TCCGACTGCACACGTGTCGCCTCCCATATCGACCCAGCCCCAGCAATTGGCCATACGTGGGCCTACACGTG  
GAACCCACCCAGAGGAGCACGTCCAATCATAAAAAAAGGAAGTATACAAAATACTGGAAAGCGTAAAG  
GAGAGGCCGAGTTTCTTCGGCACCAAGTCTCCGGAAGTTTCCCCGACCACGGCACTACTTACGTACGC  
GCCCCGAGTCTCACCTCCCACGCACCGCGCCCACGTGGACCGTGTCACTTACGACTGGGCCCCACGCGCCA  
ACGTCCGGACGCGAGTGACCTAGATAATTCGCGGGGCAGGAGCACGAAGTATCCCGACCCGGGCTATAAA  
TAGGCGACGCGCCGCGTGCCTCGGG

## 2. Possible MYB recognition site

AtLEA14-P TAACTG -185  
AtLEA14-P TAACCA -2014  
AtLEA14-P AAACCA -1510  
AtLEA14-P AAACCA -709  
AtLEA14-P AAACCA -37  
AtP5CS1-P TAACCA -220  
AtP5CS1-P AAACCA -1370  
AtDREB2A-P CAACTG -1974  
AtDREB2A-P TAACGG -963  
AtDREB2A-P TAACTG -1766  
AtDREB2A-P TAACTG -928  
AtDREB2A-P TAACCA -1666  
AtDREB2A-P AAACCA -1242  
AtDREB2A-P AAACCA -1211  
AtDREB2A-P AAACCA -344  
LcDREB2-P CAACTG -1559
