# Supplementary material for: A MYB-related transcription factor from sheepgrass, LcMYB2, promotes seed germination and root growth under drought stress
Source: PubMed Central journal article supplement (PMC6921572; doi:10.1186/s12870-019-2159-2), 2019-12-18
Supplement: 12870_2019_2159_MOESM4_ESM.pdf [file 12870_2019_2159_MOESM4_ESM.pdf]

## Primers used in this study

| Name                     | Sequence(5'-3')                | Purpose                          |
|--------------------------|--------------------------------|----------------------------------|
| GSP-5'RACE               | GACAGGCATATAGGGTATTTTC         | 5' RACE                          |
| LcMYB2-F                 | ATGACGAGGCGGTGCTCGCAC          | Full length amplification        |
| LcMYB2-R                 | GACAGGCATATAGGGTATTTTC         | Full length amplification        |
| LcMYB2-ORF-F:            | ATGACGAGGCGGTGCTCGCAC          | open reading frame amplification |
| LcMYB2-ORF-R:            | TCAAACCTGCATGGATTGGGCTG        | open reading frame amplification |
| Semi-qPCR-LcMYB2-F       | CGGCGTTCTACCCATCAT             | Semiquantitative PCR             |
| Semi-qPCR-LcMYB2-R       | TGTTGTTTCCCTGACTTAGGTC         | Semiquantitative PCR             |
| Semi-qPCR-LcActin-F      | GCACCCTGTGTTGCTCACT            | Semiquantitative PCR             |
| Semi-qPCR-LcActin-R      | TACCTTGATCTTCATGCTGCTC         | Semiquantitative PCR             |
| qPCR-LcMYB2-F            | GGGCCTTCCTAGTCAAGTCTTACAGA     | Quantitative PCR                 |
| qPCR-LcMYB2-R            | GTACAAGCGCAGGAGCTTACGC         | Quantitative PCR                 |
| qPCR-LcActin-F           | GTGCTTTCCCTCTATGCAAGTGGT       | Quantitative PCR                 |
| qPCR-LcActin-R           | CTGTTCTTGGCAGTCTCCAGCTC        | Quantitative PCR                 |
| pCAMBIA1302-LcMYB2-GFP-F | CGACTAGTATGACGAGGCGGTGCTCGCAC  | Subcellular location             |
| pCAMBIA1302-LcMYB2-GFP-R | CCCATGGAACCTGCATGGATTGGGCTG    | Subcellular location             |
| pBridge-LcMYB2-F         | GGAATTCATGACGAGGCGGTGCTCGCACT  | Transcription activity assay     |
| pBridge-LcMYB2-R         | CGGGATCCTCAAACCTGCATGGATTGGGCT | Transcription activity assay     |
| p3301-121-LcMYB2-F       | CGGGATCCATGACGAGGCGGTGCTCGCAC  | Genetic transformation           |
| p3301-121-LcMYB2-R       | CGAGCTCTCAAACCTGCATGGATTGGGCTG | Genetic transformation           |
| qPCR-AtACTIN-F           | TGCTGACCGTATGAGCAAAG           | Quantitative PCR                 |
| qPCR-AtACTIN-R           | GATTGATCCTCCGATCCAGA           | Quantitative PCR                 |
| qPCR-AtMYB2-F            | AACGTCTTCGAATCTCCGGCTGA        | Quantitative PCR                 |
| qPCR-AtMYB2-R            | ATCGTTGAACTCTCCGAAACCCGT       | Quantitative PCR                 |
| qPCR-AtP5CS1-F           | TAGCACCCGAAGAGCCCAT            | Quantitative PCR                 |
| qPCR-AtP5CS1-R           | TTTCAGTTCCAACGCCAGTAGA         | Quantitative PCR                 |
| qPCR-AtLEA14-F           | GATTTCTTCTGATCGACAAAACCTA      | Quantitative PCR                 |
| qPCR-AtLEA14-R           | AGCAAACCCAACCTATTACATTACG      | Quantitative PCR                 |
| qPCR-AtDREB2A-F          | AAACCTGTGCAACAACAGCAGG         | Quantitative PCR                 |
| qPCR-AtDREB2A-R          | TTAAGCCTGCAAACACATCGTCGC       | Quantitative PCR                 |
| qPCR-CHIP-AtP5CS1-F1     | TCCAGACCACTGCGGACTATAATTGATGAA | CHIP-enrichment                  |
| qPCR-CHIP-AtP5CS1-R1     | GCGGTTGGGGCGGACAAAAC           | CHIP-enrichment                  |
| qPCR-CHIP-AtP5CS1-F2     | ATCTAGGCTATGAATGAAGGCAGCGGACAA | CHIP-enrichment                  |
| qPCR-CHIP-AtP5CS1-R2     | GTTGCGGACCATCTGCGGACC          | CHIP-enrichment                  |
| qPCR-CHIP-AtP5CS1-F3     | AATAGAGCACATGCACAGAGGACCATTGAT | CHIP-enrichment                  |
| qPCR-CHIP-AtP5CS1-R3     | CGGCTTGATGCGATTAGGGTCTCAGATG   | CHIP-enrichment                  |
| qPCR-AtLEA14-CHIP-F1     | GCCTGTGGCCCATTTAAGTTTGACCTT    | CHIP-enrichment                  |
| qPCR-AtLEA14-CHIP-R1     | CCATATGCACGTCCGGTGAATGTAGTAGT  | CHIP-enrichment                  |
| qPCR-AtLEA14-CHIP-F2     | ACCATGCGAGGCGTAGGTTTGACTT      | CHIP-enrichment                  |
| qPCR-AtLEA14-CHIP-R2     | AGTGAAAGGGATTGGAAGAAGCGTGTC    | CHIP-enrichment                  |
| qPCR-AtLEA14-CHIP-F3     | TTTGTAGTTGGTGGGTTTGACTCTTTGGT  | CHIP-enrichment                  |
| qPCR-AtLEA14-CHIP-R3     | GCGTGAGAGTTTCCGGCGTGAA         | CHIP-enrichment                  |

---

|                       |                                 |                 |
|-----------------------|---------------------------------|-----------------|
| qPCR-AtDREB2A-CHIP-F1 | CGAGAAAGAGCAGATGAGACAGTGTGTGT   | CHIP-enrichment |
| qPCR-AtDREB2A-CHIP-R1 | CGACGAGTGTCTCCCGAATCTTCT        | CHIP-enrichment |
| qPCR-AtDREB2A-CHIP-F2 | CGATGCCGTTAGAGACACGTAGTGGATGAA  | CHIP-enrichment |
| qPCR-AtDREB2A-CHIP-R2 | TCGCAAGTTGTAGCAAAGCAGCAGTCA     | CHIP-enrichment |
| qPCR-AtDREB2A-CHIP-F3 | AGAGCCGCTACATGATCTACGAGGTT      | CHIP-enrichment |
| qPCR-AtDREB2A-CHIP-R3 | GCTTCTCTGTGGCAATATCCTGTGACC     | CHIP-enrichment |
| qPCR-LcDREB2-CHIP-F1  | GCGAAGTGCAGAGCTGGAGAAGGT        | CHIP-enrichment |
| qPCR-LcDREB2-CHIP-R1  | ATCAGTGGTGGCAAGCGTGGAGTC        | CHIP-enrichment |
| qPCR-LcDREB2-CHIP-F2  | CGGGCTGGAGAAAGAACGAGAGGAAGAAG   | CHIP-enrichment |
| qPCR-LcDREB2-CHIP-R2  | ATGCCACCGCCGAGAAACAAGGG         | CHIP-enrichment |
| qPCR-LcDREB2-CHIP-F3  | TCCTGGCGTAGCTGGAAGTCTCA         | CHIP-enrichment |
| qPCR-LcDREB2-CHIP-R3  | CGGTAGAAACAACCTCTCGGTAGTCATCTCA | CHIP-enrichment |

---
