# Supplementary material for: A MYB-related transcription factor from sheepgrass, LcMYB2, promotes seed germination and root growth under drought stress
Source: PubMed Central journal article supplement (PMC6921572; doi:10.1186/s12870-019-2159-2), 2019-12-18
Supplement: 12870_2019_2159_MOESM5_ESM.pdf [file 12870_2019_2159_MOESM5_ESM.pdf]

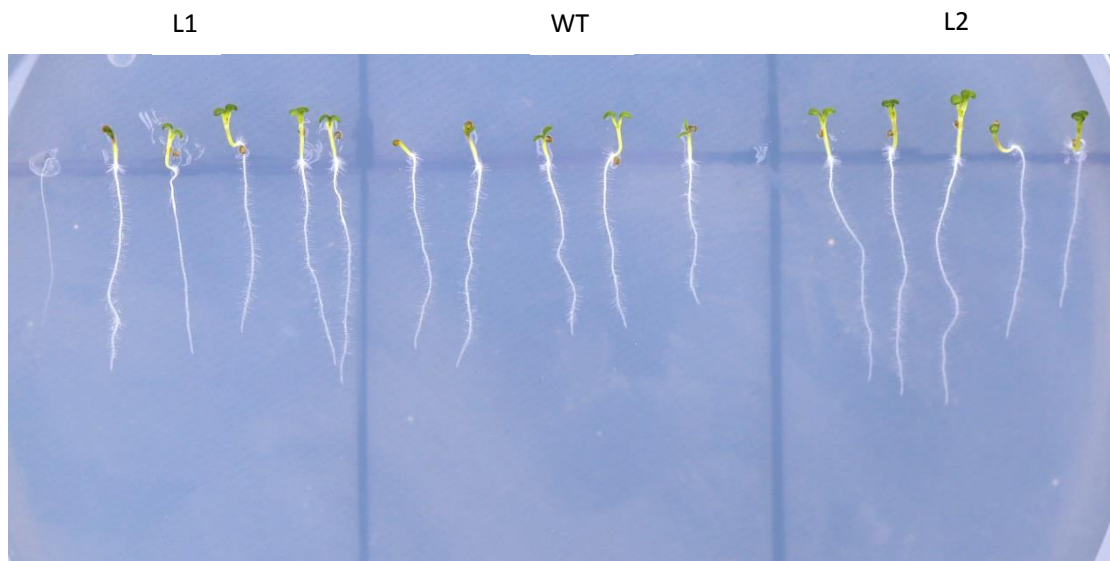

Figure A: The root growth experiment directly on MS medium. The left in the panel is L1, the middle is WT, and the right is L2.

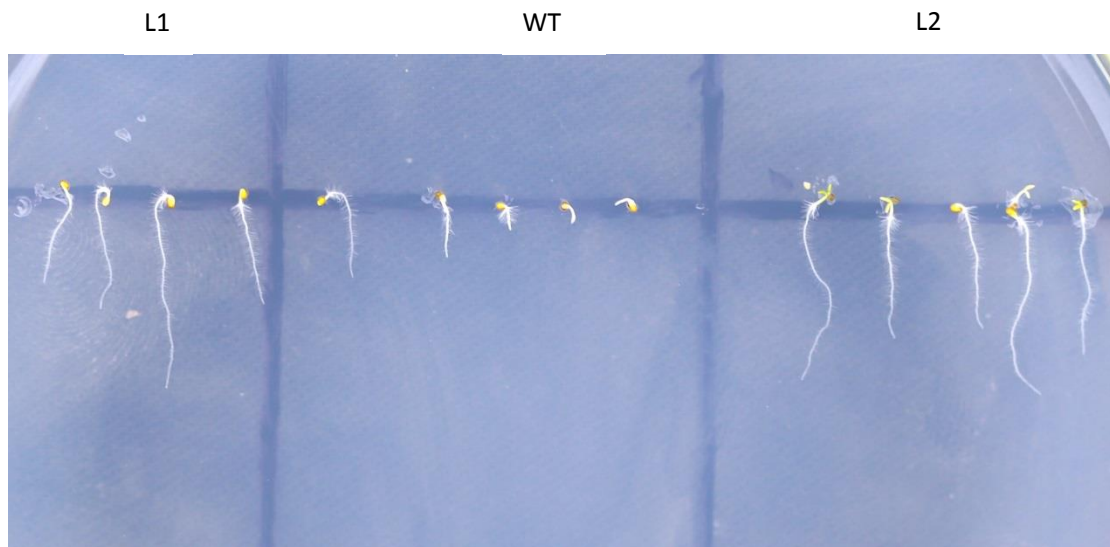

Figure B: The root growth experiment directly on MS with 300mM mannitol medium. The left in the panel is L1, the middle is WT, and the right is L2.
