# Supplementary material for: A MYB-related transcription factor from sheepgrass, LcMYB2, promotes seed germination and root growth under drought stress
Source: PubMed Central journal article supplement (PMC6921572; doi:10.1186/s12870-019-2159-2), 2019-12-18
Supplement: 12870_2019_2159_MOESM6_ESM.pdf [file 12870_2019_2159_MOESM6_ESM.pdf]

**Pearson correlation analysis between *LcMYB2* and other genes**

| GeneID           | Annotation    | contig41859 |         |
|------------------|---------------|-------------|---------|
|                  |               | r           | pvalue  |
| contig41859      | LcMYB2        | 1           | 0       |
| contig15297      | GA2OX8        | 0.99990     | 0.00897 |
| contig15178      | MYB39         | 0.99990     | 0.00893 |
| contig44866      | Peroxidase 56 | 0.99997     | 0.00473 |
| contig62249      | LcDREB2c      | 0.99997     | 0.00465 |
| contig37697      | SnRK          | 0.99991     | 0.00830 |
| 2-GH8N3EB02J6KME | LEA           | 0.99999     | 0.00256 |
